# Supplementary material for: Notch-induced endoplasmic reticulum-associated degradation governs mouse thymocyte β−selection
Source: eLife journal article supplement (doi:10.7554/elife.69975), 2021-07-09

Unprocessed images for Figure 4C

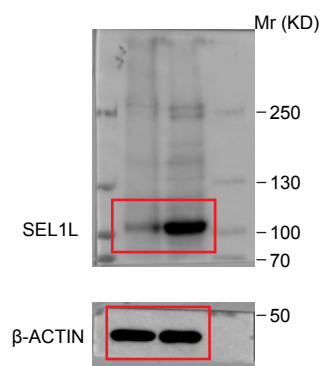

Supplement: fig4-data1 [file elife-69975-fig4-data1-v2.pdf]
