# Supplementary material for: Notch-induced endoplasmic reticulum-associated degradation governs mouse thymocyte β−selection
Source: eLife journal article supplement (doi:10.7554/elife.69975), 2021-07-09

Unprocessed images for Figure5-figure supplement 2A

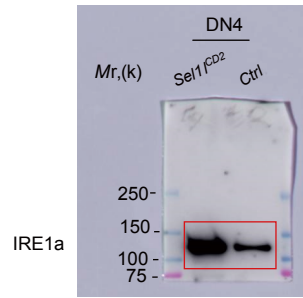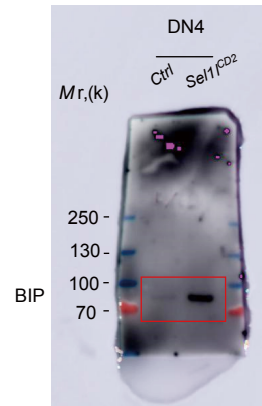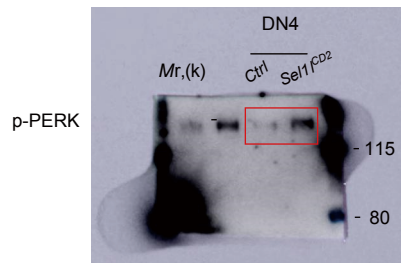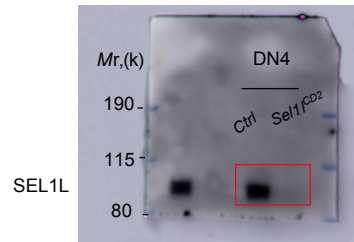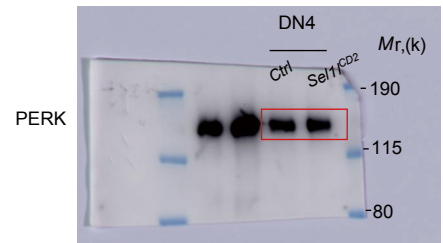

The same western blot images of SEL1L are used in Figure5H, Figure5-figure supplement 1D and Figure5-figure supplement 2A as control because these samples are from the same cell lysates probing with different antibodies.

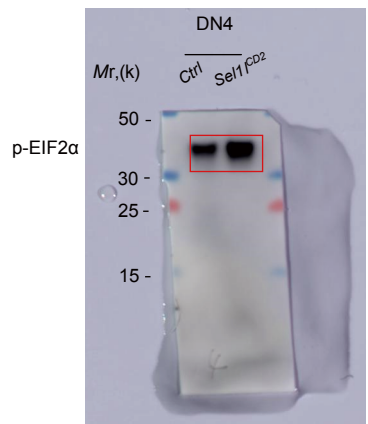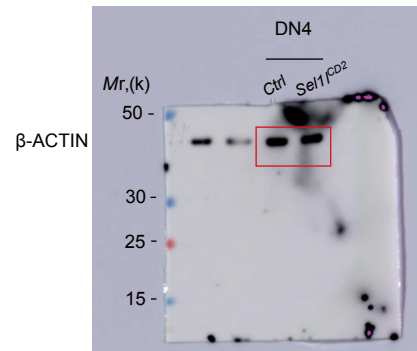

The same western blot images of ACTIN are used in both Figure5-figure supplement 1D and Figure5-figure supplement 2A as control because these samples are from the same cell lysates probing with different antibodies.

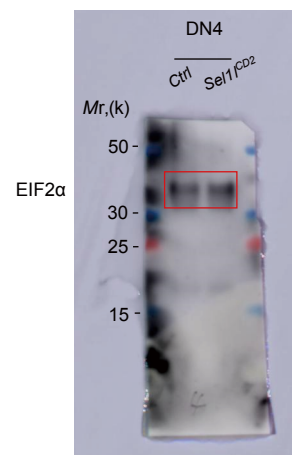

Supplement: fig5-figsupp2-data1 [file elife-69975-fig5-figsupp2-data1-v2.pdf]
