# Supplementary material for: Notch-induced endoplasmic reticulum-associated degradation governs mouse thymocyte β−selection
Source: eLife journal article supplement (doi:10.7554/elife.69975), 2021-07-09

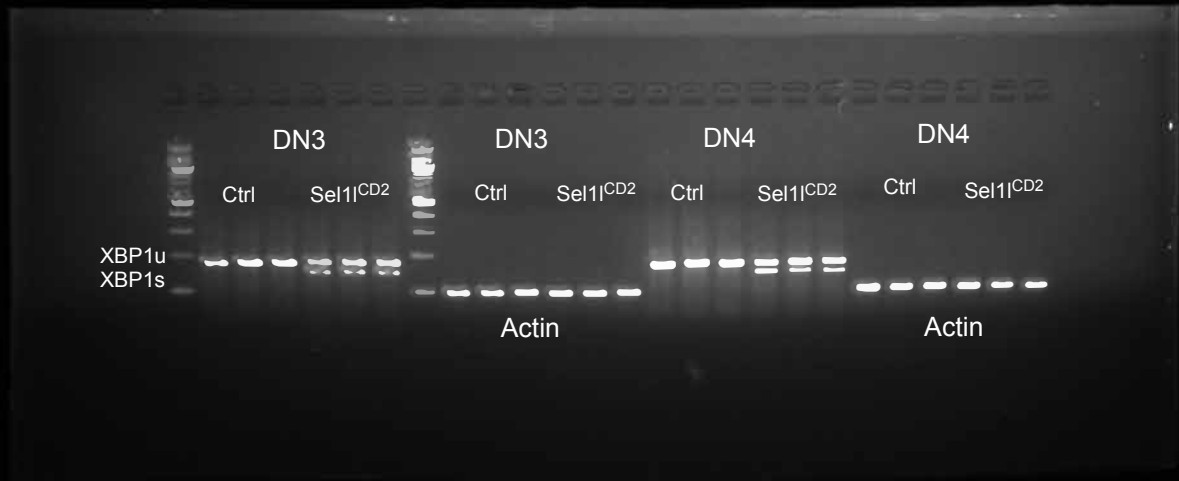

Supplement: fig5-figsupp2-data2 [file elife-69975-fig5-figsupp2-data2-v2.pdf]
