# Supplementary material for: Notch-induced endoplasmic reticulum-associated degradation governs mouse thymocyte β−selection
Source: eLife. 2021 Jul 9;10:e69975. doi: 10.7554/eLife.69975 (PMC8315795; doi:10.7554/eLife.69975)
Supplement: Figure 1—source data 1. [file elife-69975-fig1-data1.xlsx]

## Sheet: Sheet1
Figure1B	OP-Puro	ETP	DN2	DN3	DN4	DP	SP4	SP8				Bonferroni's multiple comparisons test	Summary	Adjusted P Value
		8164	15124	13828	15878	6548	6037	6362		n = 4 mice		DN4 vs. ETP	****	<0.0001
		8449	15518	13979	14560	6253	6465	6793		Biological replicates		DN4 vs. DN2	ns	>0.9999
		7275	12446	10829	10275	4953	5305	5795				DN4 vs. DN3	ns	>0.9999
		7545	13726	12053	12841	5658	5619	5913				DN4 vs. DP	****	<0.0001
												DN4 vs. SP4	****	<0.0001
												DN4 vs. SP8	****	<0.0001
Figure1C	TMI	ETP	DN2	DN3	DN4	DP	SP4	SP8		n = 7 mice		Bonferroni's multiple comparisons test	Summary	Adjusted P Value
		1111	1269	1040	560	610	729	724		Biological replicates		DN4 vs. ETP	****	<0.0001
		1292	1458	1093	559	667	729	772				DN4 vs. DN2	****	<0.0001
		1089	1401	1137	504	633	706	783				DN4 vs. DN3	****	<0.0001
		1260	1430	1083	595	648	772	846				DN4 vs. DP	ns	0.9171
		1243	1638	1245	585	713	785	863				DN4 vs. SP4	**	0.0049
		912	1261	1117	676	611	749	758				DN4 vs. SP8	***	0.0002
		1314	1438	1141	631	684	770	805
												Bonferroni's multiple comparisons test	Summary	Adjusted P Value
Figure1D	Sel1l	ETP	DN2	DN3	DN4	DP	SP4	SP8		n = 3 mice		DN4 vs. ETP	****	<0.0001
		0.00510555	0.0134632	0.014056	0.0110925	0.0083213	0.00754675	0.00655488		Biological replicates		DN4 vs. DN2	ns	0.366
		0.00880424	0.0117215	0.0153539	0.00940812	0.00704435	0.00565188	0.00555807				DN4 vs. DN3	**	0.0028
		0.00684573	0.0113472	0.0128161	0.00902969	0.00743943	0.00653766	0.00632517				DN4 vs. DP	****	<0.0001
												DN4 vs. SP4	****	<0.0001
												DN4 vs. SP8	****	<0.0001
												Bonferroni's multiple comparisons test	Summary	Adjusted P Value
	Xbp1	ETP	DN2	DN3	DN4	DP	SP4	SP8				DN4 vs. ETP	****	<0.0001
		0.0136044	0.0361967	0.050183	0.0170399	0.019542	0.0101182	0.00615485				DN4 vs. DN2	**	0.0057
		0.0167224	0.0399453	0.0599385	0.014826	0.0228496	0.0120596	0.00696387				DN4 vs. DN3	****	<0.0001
		0.010662	0.0243386	0.0419951	0.0092268	0.0167785	0.00814648	0.00373245				DN4 vs. DP	****	<0.0001
												DN4 vs. SP4	****	<0.0001
												DN4 vs. SP8	****	<0.0001
												Bonferroni's multiple comparisons test	Summary	Adjusted P Value
	Hspa5	ETP	DN2	DN3	DN4	DP	SP4	SP8				DN4 vs. ETP	****	<0.0001
		0.0603856	0.0969427	0.152555	0.0712464	0.0375777	0.0444887	0.0393028				DN4 vs. DN2	*	0.0242
		0.0608195	0.0999035	0.127891	0.0926167	0.0353769	0.0529179	0.0539552				DN4 vs. DN3	***	0.0003
		0.086054	0.119314	0.127053	0.0878846	0.0417123	0.0581442	0.0400708				DN4 vs. DP	****	<0.0001
												DN4 vs. SP4	****	<0.0001
												DN4 vs. SP8	****	<0.0001
												Bonferroni's multiple comparisons test	Summary	Adjusted P Value
	Dnajb9	ETP	DN2	DN3	DN4	DP	SP4	SP8				DN4 vs. ETP	****	<0.0001
		0.00951057	0.0131668	0.019282	0.00697984	0.0129154	0.00972067	0.00845262				DN4 vs. DN2	****	<0.0001
		0.012617	0.0162478	0.0223238	0.00678718	0.0139025	0.00969725	0.0102614				DN4 vs. DN3	****	<0.0001
		0.0107364	0.0151929	0.0217906	0.00654855	0.0132906	0.00940357	0.00793015				DN4 vs. DP	****	<0.0001
												DN4 vs. SP4	****	<0.0001
												DN4 vs. SP8	****	<0.0001
												Bonferroni's multiple comparisons test	Summary	Adjusted P Value
	Atf4	ETP	DN2	DN3	DN4	DP	SP4	SP8				DN4 vs. ETP	***	0.0006
		0.0194427	0.0284618	0.0323355	0.0276717	0.0160815	0.0136015	0.015585				DN4 vs. DN2	**	0.0063
		0.0212619	0.0206271	0.0355216	0.028902	0.0205209	0.0148586	0.0155794				DN4 vs. DN3	ns	0.0993
		0.0273155	0.0267269	0.0345699	0.0282557	0.0193366	0.0143262	0.0112931				DN4 vs. DP	****	<0.0001
												DN4 vs. SP4	****	<0.0001
												DN4 vs. SP8	****	<0.0001
												Bonferroni's multiple comparisons test	Summary	Adjusted P Value
	Ddit3	ETP	DN2	DN3	DN4	DP	SP4	SP8				DN4 vs. ETP	ns	0.0577
		0.00391291	0.00453255	0.00785734	0.00468932	0.00448755	0.00578454	0.0036814				DN4 vs. DN2	*	0.0227
		0.00658431	0.0047796	0.00828588	0.00396152	0.00392242	0.00557532	0.00310434				DN4 vs. DN3	**	0.0031
		0.0053389	0.00542758	0.00669931	0.00373049	0.00419078	0.00539704	0.00651593				DN4 vs. DP	**	0.0038
												DN4 vs. SP4	ns	0.1251
												DN4 vs. SP8	**	0.0067
