# Supplementary material for: Notch-induced endoplasmic reticulum-associated degradation governs mouse thymocyte β−selection
Source: eLife. 2021 Jul 9;10:e69975. doi: 10.7554/eLife.69975 (PMC8315795; doi:10.7554/eLife.69975)
Supplement: Figure 2—figure supplement 1—source data 2. [file elife-69975-fig2-figsupp1-data2.xlsx]

## Sheet: Sheet1
Figure 2 - figure supplement 1A	Sel1l		Sel1lfl/fl				Sel1lfl/fl hCD2-iCre					P value		n = 4 mice
		LMPP	0.0109485	0.0113722	0.0124415		0.0107791	0.0112813	0.0103423	0.0121619		0.485664		Biological replicates
		CLP	0.0117217	0.010221	0.00849599	0.00640001	0.00591086	0.00610067	0.00766996	0.00789473		0.114841
		ETP	0.006113	0.004834	0.004875	0.004562	0.003955	0.002761	0.003765	0.002229		0.011742
		DN2	0.009243	0.008771	0.008086	0.00841335	0.000596	0.000491	0.00155759	0.00201026		3e-06
		DN3	0.013008	0.011621	0.016647	0.018002	1.69e-05	1.88e-05	7.44998e-05	1.60322e-05		6.3e-05
		DN4	0.00575995	0.007577	0.005308	0.006917	0.000855248	0.000173	8.7e-05			0.000245
		DP	0.0113821	0.00716399	0.0120212	0.005543	0.00296141	0.00193714	0.0001684			0.014315
		SP4	0.00425369	0.00337451	0.003586	0.0048127	0.00217016	0.00061	0.0010027			0.004171
		SP8	0.00657685	0.00427			9.31931e-05	1.82279e-05	0.00182105	0.00192		0.013493
Figure 2 - figure supplement 1D	Total thymocytes	Perkfl/fl	Perkfl/fl hCD2-iCre		n = 4 mice
		226.196	206.371		Biological replicates
		191.86	231.395
		220.798	149.779		P value	0.3843
		178.816	133.281
Figure 2 - figure supplement 1E		Perkfl/fl				Perkfl/fl hCD2-iCre					P value	n = 4 mice
	DN	6.76486	5.1102	5.56321	5.60748	5.27285	6.74804	4.24059	4.35366		0.404952	Biological replicates
	DP	163.507	131.216	159.188	123.266	142.659	169.69	106.319	84.8646		0.421619
	SP4	15.4336	16.5401	17.0272	14.8027	17.5252	16.4042	11.9041	12.0323		0.374124
	SP8	3.63076	3.19723	3.96581	4.06425	3.43338	3.46616	2.46325	2.67197		0.072289
Figure 2 - figure supplement 1F	Spleen
		Perkfl/fl				Perkfl/fl hCD2-iCre					P value	n = 4 mice
	total	136.904	97.5768	112.726	109.583	157.944	144.074	96.8256	60.5275		0.979257	Biological replicates
	T cell	33.0088	22.8	22.7903	32.6389	41.2771	35.6762	24.6103	11.3139		0.956576
	SP4	21.5788	16.0232	15.4069	20.9208	25.7979	22.0324	16.6179	8.02231		0.933275
	SP8	11.4584	7.08659	7.6869	11.8139	13.7792	11.5886	8.00897	3.47809		0.911479
Figure 2 - figure supplement 1H	Total thymocytes	Xbp1fl/fl	Xbp1fl/fl hCD2-iCre		n = 3~4 mice
		201.995	222.019		Biological replicates
		158.381	281.709
		306.483	123.746		P value	0.1823
		322.054	207.474
		336.914	165.49
Figure 2 - figure supplement 1I		Xbp1fl/fl					Xbp1fl/fl hCD2-iCre						P value		n = 5 mice
	DN	5.84626	4.337	8.9172	52.6355	7.72754	5.60391	8.51716	3.23489	5.62448	4.36895		0.293031		Biological replicates
	DP	172.07	134.766	253.53	221.134	281.576	176.242	242.4	107.581	179.568	139.937		0.248308
	SP4	11.5541	10.052	22.1539	16.816	18.4163	13.6823	17.8836	8.16812	14.2749	12.8588		0.398614
	SP8	3.84239	2.6321	5.18822	4.23434	3.52653	3.07118	5.46711	1.97324	3.60641	3.35617		0.595278
Figure 2 - figure supplement 1J	Spleen
		Xbp1fl/fl					Xbp1fl/fl hCD2-iCre						P value		n = 5 mice
	total	74.3193	60.958	65.0625	83.6664	62.3889	79.4257	67.0538	49.7885	81.2399	65.1764		0.91947		Biological replicates
	T cell	24.5711	19.0906	18.4619	24.6609	17.5067	18.9584	14.1296	11.5898	16.8133	15.2514		0.024309
	SP4	15.3827	13.4909	12.0095	15.641	11.5441	13.4448	9.72027	8.22615	11.9702	10.7542		0.053017
	SP8	9.48105	5.83246	6.52504	9.28118	6.06825	5.93149	4.66611	3.55865	5.09355	4.84354		0.018482
Figure 2 - figure supplement 1L	Total thymocytes	Atf6fl/fl	Atf6fl/fl Vav-Cre		n = 5 mice
		81.6	60.8		Biological replicates
		64	149.6
		100.8	162		P value	0.3513
		138	196
		220	234
Figure 2 - figure supplement 1M		Atf6fl/fl					Atf6fl/fl Vav-Cre						P value		n = 5 mice
	DN	2.97024	1.4656	3.16512	3.7536	7.128	1.90912	4.72736	5.2488	7.4872	8.0262		0.250566		Biological replicates
	DP	70.6656	56.768	87.192	119.094	185.46	53.0176	134.939	139.32	167.972	201.006		0.322686
	SP4	5.73648	4.6144	7.19712	11.1228	20.372	4.56	7.76424	11.2104	15.1312	17.9946		0.695127
	SP8	2.22768	1.12	3.20544	4.0848	6.93	1.34368	2.15424	6.2208	5.488	6.9732		0.555572
Figure 2 - figure supplement 1N	Spleen
		Atf6fl/fl					Atf6fl/fl Vav-Cre						P value		n = 5 mice
	total	165.3	106.8	72.6	88.8	114	104.4	96	107.7	87.6	107.4		0.59799		Biological replicates
	T cell	23.6379	20.6124	11.7612	15.096	25.878	10.6488	17.952	16.6935	20.4108	27.387		0.842009
	SP4	13.8755	12.1407	6.76269	7.81973	15.1128	6.6981	10.9328	10.2999	11.8791	17.0347		0.925375
	SP8	8.41509	7.29679	4.36341	6.14407	9.49723	3.27983	5.88826	5.392	7.53159	9.11987		0.51779
Figure 2 - figure supplement 1P	Spleen	Sel1lfl/fl				Sel1lfl/fl hCD2-iCre						n = 4 mice			P value
	Total	49.248	72.1112	67.461	52.7712	7.3602	7.0224	10.0513	8.7696			Biological replicates			8.7e-05
	T	18.2218	30.0704	26.0399	21.4779	2.30374	1.98734	2.65354	2.43795						0.000164
	CD4	12.5582	18.821	17.27	14.301	1.15555	1.04634	1.51775	1.2979						5.1e-05
	CD8	3.7921	8.14857	6.41554	5.10298	0.538031	0.414322	0.492514	0.445496						0.001161
Figure 2 - figure supplement 1R	LN	Sel1lfl/fl				Sel1lfl/fl hCD2-iCre						n = 4 mice			P value
	Total	8.48	8.36	8.68	7.5	1.51	1.54	0.918	1.02			Biological replicates			<0.000001
	T	6.8264	6.37868	6.90928	5.6475	1.31068	1.31054	0.800496	0.85578						3e-06
	CD4	4.68944	4.46424	4.92156	4.05	1.01321	0.97944	0.636174	0.64872						2e-06
	CD8	1.75536	1.49644	1.63184	1.305	0.18422	0.23254	0.10098	0.13362						9e-06
Figure 2 - figure supplement 1S	gdT	Sel1lfl/fl	Sel1lfl/fl hCD2-iCre		n = 4~5 mice
		0.3648	0.322455		Biological replicates
		0.396	0.3684
		0.3192	0.340875		P value	0.5025
		0.29766	0.27702
			0.3222
