# Supplementary material for: Notch-induced endoplasmic reticulum-associated degradation governs mouse thymocyte β−selection
Source: eLife. 2021 Jul 9;10:e69975. doi: 10.7554/eLife.69975 (PMC8315795; doi:10.7554/eLife.69975)
Supplement: Figure 2—figure supplement 2—source data 1. [file elife-69975-fig2-figsupp2-data1.xlsx]

## Sheet: Sheet1
Figure 2 - figure supplement 2C	Sel1l		Sel1lfl/fl			Sel1lfl/fl Cd4-Cre				P value	n = 3 mice
		ETP	0.00671059	0.00686341	0.00265952	0.00398524	0.00671729	0.00728981		0.749392	Biological replicates
		DN2	0.00130259	0.00329638	0.00375353	0.00364442	0.00631031	0.00638528		0.085959
		DN3	0.0067763	0.00744774	0.00581398	0.00402473	0.00586756	0.00692571		0.331079
		DN4	0.00475339	0.00346234	0.00466215	0.00249795	0.00218629	0.00355405		0.05785
		ISP	0.00403925	0.00418407	0.00452308	0.000969097	0.00251978	0.00265559		0.017069
		DP	0.00356628	0.00451005	0.00430937	0.000589727	0.000608707	0.0015862		0.001844
		SP4	0.00305978	0.00233374	0.00290246	0.000102206	9.10296e-05	9.29047e-05		0.000267
		SP8	0.00233324	0.00225934	0.0026944	3.59779e-05	5.41455e-05	1.37678e-05		5.9e-05
Figure 2 - figure supplement 2E	Total thymocytes	Sel1lfl/fl	Sel1lfl/fl Cd4-Cre		n = 3 mice
		314.805	203.125		Biological replicates
		269.082	217.505
		271.212	295.765		P value	0.2269
Figure 2 - figure supplement 2F		Sel1lfl/fl			Sel1lfl/fl Cd4-Cre				P value	n = 3 mice
	DN	10.134	7.38396	8.02682	7.31406	8.90461	14.5928		0.498324	Biological replicates
	DP	272.655	239.327	237.879	179.087	191.3	250.263		0.15662
	SP4	20.1664	14.0734	15.6423	9.7512	10.0083	17.2312		0.232568
	SP8	4.72313	3.2445	3.72773	2.30625	2.462	4.33199		0.331235
Figure 2 - figure supplement 2G		Sel1lfl/fl			Sel1lfl/fl Cd4-Cre				P value
	ETP	0.0538725	0.0666236	0.0387879	0.0438702	0.0905398	0.109205		0.252273	n = 3 mice
	DN2	0.4348	0.347865	0.233485	0.478005	0.544942	0.676934		0.050794	Biological replicates
	DN3	3.52977	2.19004	2.34	2.86563	3.2918	5.00333		0.255048
	DN4	5.32165	4.25886	4.83773	3.58125	4.55202	8.02223		0.696837
	ISP	1.23901	1.42569	1.75615	1.04668	1.60757	2.93025		0.539249
Figure 2 - figure supplement 2H		Sel1lfl/fl					Sel1lfl/fl hCD2-iCre					P value		n = 4~5 mice
	Whole BMs	40.5	33.8	29.9	22.7	27.7	32.8	40.7	22.7	25.8		0.933901		Biological replicates
	LSK	40.8	35.3	33.3	28.5	62	46	51.7	35	26.2		0.976351
	LS-K	43.1	32.3	32.6	29.1	45.2	47.6	51.2	31.3	26.6		0.685388
	HPC-1	45.2	34.9	27.9	23.3	50.4	39.7	51.8	25	22.6		0.856176
	HPC-2	52.2	45.3	42.6	35.7	74.4	53.6	45.9	22.7	24.5		0.228614
	HSC	29.9	41	55.6	44.5	87.8	64.9	79.3	58.3	44.4		0.465291
	MPP	25.7	27.7	32.9	32.1	54.1	36	44.2	30.7	26.1		0.971256
Figure 2 - figure supplement 2I	DN3/DN4	Sel1lfl/fl	Sel1lfl/fl hCD2-iCre		n = 4 mice
		0.34	0.93		Biological replicates
		0.31	1.02
		0.33	1.31		P value	0.0003
		0.21	1.38
Figure 2 - figure supplement 2J	Spleen	Sel1lfl/fl					Sel1lfl/fl hCD2-iCre					P value		n = 4~5 mice
	CD4+T	33.5	28.7	15.9	23.2	18.4	0.18	0.51	0.25	0.14		0.000353		Biological replicates
	CD8+T	36.2	30.4	18	24.6	22.3	0.26	0.64	0.43	0.27		0.000181
	Myeloid	35.8	32.4	20.5	44.2	41.7	35	55.8	34	24.2		0.765382
	DC	53.5	49	35.9	56.9	57.2	42.7	56.9	51.6	27.6		0.446108
	B cell	48.3	40.3	29.8	50	37.1	1.66	2.63	1.78	1.06		3.4e-05
Figure 2 - figure supplement 2L	DN3	Sel1lfl/fl			Sel1lfl/fl hCD2-iCre				n = 3 mice		P value
	G0	63.7	64.3	56.2	61.9	53	62.8		Biological replicates		>0.9999
	G1	29.3	30.1	35.2	28.1	35.8	30.1				>0.9999
	S/G2/M	6.97	5.52	8.49	8.57	10.8	5.76				>0.9999
