# Supplementary material for: Notch-induced endoplasmic reticulum-associated degradation governs mouse thymocyte β−selection
Source: eLife. 2021 Jul 9;10:e69975. doi: 10.7554/eLife.69975 (PMC8315795; doi:10.7554/eLife.69975)
Supplement: Figure 2—source data 1. [file elife-69975-fig2-data1.xlsx]

## Sheet: Sheet1
Figure 2B	Thymus weight（g）	Sel1lfl/fl	Sel1lfl/fl hCD2-iCre		n = 4 mice
		0.0874	0.0493		Biological replicates
		0.0925	0.0427
		0.0875	0.0433		P value	<0.0001
		0.0843	0.0536
Figure 2C	Total thymocytes	Sel1lfl/fl	Sel1lfl/fl hCD2-iCre
		415.5	209		n = 4 mice
		266	117		Biological replicates
		410	171
		380	144		P value	0.002
Figure 2E		Sel1lfl/fl				Sel1lfl/fl hCD2-iCre							P value
	ETP	0.07533	0.131	0.123075	0.11088	0.14905	0.109225	0.0911805	0.09112		n = 4 mice		0.996974
	DN2	0.13392	0.18864	0.106665	0.10692	0.1626	0.1542	0.14343	0.1876		Biological replicates		0.240998
	DN3	2.7714	2.8773	4.1961	3.621	3.2	3.31959	3.74556	4.356				0.521911
	DN4	2.8179	1.3886	2.4068	2.6928	2.7642	2.58285	1.9568	2.3316				0.830564
Figure 2F		Sel1lfl/fl				Sel1lfl/fl hCD2-iCre							P value
	DN	5.0499	3.6418	4.67685	4.005	5.67745	5.17855	4.06726	5.0786		n = 4 mice		0.20654
	DP	233.244	214.054	222.903	178.425	108.671	102.543	80.8331	109.344		Biological replicates		0.000179
	SP4	14.1732	21.5102	18.2425	20.745	4.99995	4.6003	4.06726	5.1188				0.000158
	SP8	4.8546	7.0478	6.75545	6.8175	1.9783	1.8247	1.69043	1.7688				0.000113
Figure 2I		Sel1lfl/fl					Sel1lfl/fl hCD2-iCre					P value
	ETP	52.6	24.8	17.6	26.9	20.5	19.8	24.5	28.8	41.3		0.98868		n = 4~5 mice
	DN2	43.9	30.2	19	32.7	25.8	19.9	23.9	37.3	37.5		0.9162		Biological replicates
	DN3	39.4	23.9	17.2	34.9	30	17.2	40	26.9	54.1		0.53262
	DN4	49.1	33.1	17.3	31.6	27.3	7.95	16.5	18.6	20.1		0.03995
	DP	51.3	30.9	14.4	24.4	23.6	3.61	8.38	7.01	14.2		0.02522
	SP4	50	37.5	16.3	29.9	19	2.28	5.53	2.78	5.47		0.00704
	SP8	52.7	36.5	15.2	28.1	18.5	2.38	8.25	8.1	7.81		0.01892
Figure 2L	DN3/DN (%)	Sel1lfl/fl			Sel1lfl/fl hCD2-iCre				P value		n = 4 mice
	D5	81.6	81.1	83.8	77.9	79.4	51.4		0.7		Biological replicates
	D12	88.7	68.1	69.3	67.2	77.7	92		>0.9999
	D17	48.8	22.2	22.8	73.2	59.2	82.5		0.0051
Figure 2M	DN4/DN (%)	Sel1lfl/fl			Sel1lfl/fl hCD2-iCre				P value
	D5	4.1	5.15	6.07	5.45	5.94	7.23		>0.9999
	D12	11.3	31.9	30.4	32.8	22.3	8.01		>0.9999
	D17	51.2	77.8	77.2	26.8	40.8	17.5		0.0015
