# Supplementary material for: Notch-induced endoplasmic reticulum-associated degradation governs mouse thymocyte β−selection
Source: eLife. 2021 Jul 9;10:e69975. doi: 10.7554/eLife.69975 (PMC8315795; doi:10.7554/eLife.69975)
Supplement: Figure 3—source data 1. [file elife-69975-fig3-data1.xlsx]

## Sheet: Sheet1
Figure 3A	Brdu	Sel1lfl/fl				Sel1lfl/fl hCD2-iCre				n = 3~4 mice		P Value
	ETP	31.1	26.4	26	33	33.7	38.9	43.7		Biological replicates		0.5709
	DN2	15.7	42.9	35.9	29.6	49.6	22.4	56.4				0.3086
	DN3	52.1	55.9	55	61.8	58.1	54.2	63.5				>0.9999
	DN4	37.4	48	43	38.5	57.2	54.7	66				0.0461
Figure 3C	DN4	Sel1lfl/fl			Sel1lfl/fl hCD2-iCre				n = 3 mice		P Value
	G0	67.3	49	72.5	33	22.6	27.5		Biological replicates		0.0001
	G1	25.4	35.4	20.1	48	57.5	54				0.0016
	S/G2/M	6.89	14.4	7.27	19.1	18.8	17.1				0.424
Figure 3D	AnnexinV	Sel1lfl/fl	Sel1lfl/fl hCD2-iCre		n = 3 mice
		30.4	51.4		Biological replicates
		32.3	50.9
		31.9	56.7		P value	0.0004
Figure 3F	CC3	Sel1lfl/fl	Sel1lfl/fl hCD2-iCre		n = 4 mice
		17	78		Biological replicates
		18	49
		35	55		P value	<0.0001
		30	56
		32	44
		38	60
		40	50
		28	61
		25	83
		20	76
		26	101
		12	80
		20	84
		27	97
		21	100
		30	110
Figure 3H	TUNEL	Sel1lfl/fl	Sel1lfl/fl hCD2-iCre		n = 4 mice
		0.62	2.92		Biological replicates
		0.7	2.92
		0.93	1.39		P value	0.0125
		0.37	1.54
