# Supplementary material for: Notch-induced endoplasmic reticulum-associated degradation governs mouse thymocyte β−selection
Source: eLife. 2021 Jul 9;10:e69975. doi: 10.7554/eLife.69975 (PMC8315795; doi:10.7554/eLife.69975)
Supplement: Figure 4—figure supplement 1—source data 1. [file elife-69975-fig4-figsupp1-data1.xlsx]

## Sheet: Sheet1
Figure 4 - figure supplement 1A	Hes1	PBS	DLL4	P value		Deltex	PBS	DLL4	P value		Ptcra	PBS	DLL4	P value		n = 3
		0.0026	0.0055	8.36299e-05			0.0227	0.0973	0.00156929			0.0005	0.0027	0.015033		Technical replicates
		0.0028	0.0055				0.0212	0.0725				0.0014	0.0021
		0.0031	0.0053				0.0254	0.0993				0.0013	0.0028
Figure 4 - figure supplement 1B	Hes1	DMSO	DAPT			Deltex	DMSO	DAPT			Ptcra	DMSO	DAPT			n = 3
		0.00035364	0.000230647	P Value			0.00250096	0.00075999	P Value			0.000263122	6.82497e-05	P Value		Technical replicates
		0.000399251	0.0002023	0.0026			0.00230226	0.000736432	0.0003			0.000336504	6.13408e-05	0.0009
		0.000332023	0.000193322				0.00276253	0.000916596				0.000267361	8.14896e-05
Figure 4 - figure supplement 1C		Sel1lfl/fl		Sel1lfl/fl hCD2-iCre					P value	n = 2~4 mice
	DN2	522	332	515	483	354	573		0.581678	Biological replicates
	DN3	1022	901	994	996	895	1216		0.587589
	DN4	157	70.6	179	153	175	152		0.148673
Figure 4 - figure supplement 1D	Hes1	Sel1lfl/fl	Sel1lfl/fl hCD2-iCre	P value		Ptcra	Sel1lfl/fl	Sel1lfl/fl hCD2-iCre	P value							n = 4
		0.0396287	0.0346665	0.1987			0.028231	0.0246078	0.1925							Biological replicates
		0.0378467	0.0462778				0.0278921	0.0384342
		0.0374682	0.0459541				0.0242897	0.0259451
		0.0420509	0.055892				0.0238548	0.039935
