# Supplementary material for: Notch-induced endoplasmic reticulum-associated degradation governs mouse thymocyte β−selection
Source: eLife. 2021 Jul 9;10:e69975. doi: 10.7554/eLife.69975 (PMC8315795; doi:10.7554/eLife.69975)
Supplement: Figure 4—source data 2. [file elife-69975-fig4-data2.xlsx]

## Sheet: Sheet1
Figure 4A	sNOTCH1	ETP	DN2	DN3	DN4	DP	SP4	SP8		n = 5 mice		Bonferroni's multiple comparisons test	Summary	P Value
		647	2153	2711	97.2	207	147	161		Biological replicates		DN3 vs. ETP	****	<0.0001
		712	2276	2528	110	176	138	168				DN3 vs. DN2	****	<0.0001
		789	2203	2667	121	166	129	143				DN3 vs. DN4	****	<0.0001
		950	1963	2330	83.8	211	151	209				DN3 vs. DP	****	<0.0001
		901	2123	2789	94.3	251	167	233				DN3 vs. SP4	****	<0.0001
												DN3 vs. SP8	****	<0.0001
Figure 4B	Sel1l	PBS	DLL4	P Value		Hrd1	PBS	DLL4	P Value		Os9	PBS	DLL4	P Value		Edem1	PBS	DLL4	P Value		n = 3
		0.0368983	0.081403	<0.0001			0.0301	0.0493	0.0002			0.0311	0.0474	0.0004			0.0079	0.0331	0.0026		Technical replicates
		0.0350378	0.0755592				0.0277	0.0484				0.0336	0.0483				0.0118	0.0377
		0.037832	0.0778097				0.0319	0.0468				0.0315	0.0445				0.0055	0.0269
Figure 4D	Sel1l	DMSO	DAPT			Hrd1	DMSO	DAPT			Os9	DMSO	DAPT			Edem1	DMSO	DAPT			n = 3
		0.0267426	0.0169112	P Value			0.0146488	0.00922686	P Value			0.0212047	0.0157797	P Value			0.0619072	0.0421579	P Value		Technical replicates
		0.0255148	0.0177918	0.0003			0.0144086	0.00987823	0.0084			0.0189221	0.014696	0.0053			0.0501919	0.0387967	0.0113
		0.0253426	0.0186952				0.0120779	0.00978043				0.0189284	0.0148378				0.0558342	0.0360061
Figure 4F	RBPJ ChIP		PBS			DLL4				n = 3		P Value
		P1	0.20422	0.16449	0.16745	0.26394	0.34924	0.30177		Technical replicates		0.0104677
		P2	0.24129	0.33559	0.18003	1.07586	0.7536	0.759378				0.00617624
		P3	0.15672	0.14738	0.12349	0.22998	0.14323	0.22031				0.130884
	NICD ChIP		PBS			DLL4				n = 3		P Value
		P1	0.02617	0.07357	0.06178	0.31161	0.19046	0.2876		Technical replicates		0.00618464
		P2	0.07612	0.09322	0.06205	0.33393	0.36054	0.27872				0.000655022
		P3	0.03299	0.06661	0.01554	0.04422	0.11413	0.08795				0.159132
	IgG ChIP		PBS			DLL4				n = 3		P Value
		P1	0.07047	0.07647	0.09657	0.05343	0.05927	0.06695		Technical replicates		0.0730639
		P2	0.02749	0.01578	0.00946	0.0548	0.02575	0.05149				0.0670647
		P3	0.03843	0.11378	0.15002	0.13298	0.06323	0.09648				0.938216
Figure 4G	RBPJ ChIP		PBS			DLL4				n = 3		P Value
		P1	0.10199	0.08916	0.07774	0.31387	0.27683	0.28891		Technical replicates		9.59915e-05
		P2	0.16935	0.18296	0.1035	0.25986	0.30233	0.31639				0.00915846
		P3	0.05105	0.07636	0.15377	0.09603	0.14343	0.11848				0.491128
	NICD ChIP		PBS			DLL4				n = 3		P Value
		P1	0.04522	0.06535	0.08517	0.17202	0.12066	0.13614		Technical replicates		0.0152218
		P2	0.12012	0.15245	0.15527	0.25412	0.22669	0.24292				0.00202983
		P3	0.09908	0.17652	0.17564	0.00247	0.10147	0.02147				0.0522656
	IgG ChIP		PBS			DLL4				n = 3		P Value
		P1	0.02556	0.06335	0.09879	0.09116	0.09247	0.05117		Technical replicates		0.565775
		P2	0.05777	0.0596	0.07584	0.06592	0.07303	0.07477				0.342159
		P3	0.01322	0.00609	0.15928	0.05828	0.05664	0.08492				0.895747
Figure 4H	RBPJ ChIP		PBS			DLL4				n = 3		P Value
		P1	0.19818	0.25201	0.26995	0.55264	0.5552	0.3768		Technical replicates		0.0154244
		P2	0.10853	0.11826	0.13456	0.10623	0.05842	0.07055				0.060671
	NICD ChIP		PBS			DLL4				n = 3		P Value
		P1	0.09352	0.04077	0.05852	0.27766	0.26534	0.36646		Technical replicates		0.00251991
		P2	0.11347	0.03538	0.01226	0.01399	0.0244	0.0231				0.34157
	IgG ChIP		PBS			DLL4				n = 3		P Value
		P1	0.17045	0.08481	0.10617	0.12382	0.17223	0.17353		Technical replicates		0.302611
		P2	0.02002	0.06501	0.06809	0.02752	0.02735	0.0265				0.198597
Figure 4I	RBPJ ChIP		PBS			DLL4				n = 3		P Value
		P1	0.17886	0.24842	0.27313	0.4284	0.58992	0.5747		Technical replicates		0.00714426
		P2	0.02957	0.03476	0.03919	0.05508	0.02317	0.07137				0.34681
	NICD ChIP		PBS			DLL4				n = 3		P Value
		P1	0.03433	0.08933	0.0286	0.2882	0.17518	0.2544		Technical replicates		0.00820284
		P2	0.0349	0.03067	0.06146	0.07459	0.05305	0.02643				0.622789
	IgG ChIP		PBS			DLL4				n = 3		P Value
		P1	0.13409	0.12409	0.12044	0.10348	0.10026	0.1028		Technical replicates		0.004605
		P2	0.08483	0.01565	0.03317	0.05952	0.05539	0.02741				0.906413
Figure 4J		NICD -			NICD ++			NICD ++++						Bonferroni's multiple comparisons test	Summary	P Value	Bonferroni's multiple comparisons test	Summary	P Value
	PGL3 basic	0.002124	0.004998	0.005741	0.017752	0.004528	0.022665	0.0589583	0.009688	0.018692		n = 3, biological replicates		NICD - vs. NICD ++	ns	>0.9999	NICD ++ vs. NICD ++++	ns	0.9731
	Sel1l promoter	0.100762	0.110852	0.172901	0.724491	0.979496	1.02222	1.73317	1.74917	1.81877		n = 3, biological replicates		NICD - vs. NICD ++	***	0.0001	NICD ++ vs. NICD ++++	****	<0.0001
	Hrd1 promoter	0.030256	0.040148	0.037952	0.636839	0.893158	0.910227	2.24742	2.28137	2.42498		n = 3, biological replicates		NICD - vs. NICD ++	***	0.0003	NICD ++ vs. NICD ++++	****	<0.0001
Figure 4K		PBS			DLL4						P Value
	WT	0.724302	0.910819	0.314286	3.36364	3.31608	2.64082		n = 3, biological replicates		0.00109839
	Mut	0.280488	0.11975	0.312625	0.97456	0.576487	0.254682		n = 3, biological replicates		0.167858
Figure 4L		PBS			DLL4						P Value
	WT	1.92312	1.10875	0.976412	8.2106	5.26019	4.73076		n = 3, biological replicates		0.0135254
	Mut	0.356947	0.38193	0.716947	0.828298	0.616561	0.229063		n = 3, biological replicates		0.747058
