# Supplementary material for: Notch-induced endoplasmic reticulum-associated degradation governs mouse thymocyte β−selection
Source: eLife. 2021 Jul 9;10:e69975. doi: 10.7554/eLife.69975 (PMC8315795; doi:10.7554/eLife.69975)
Supplement: Figure 5—figure supplement 1—source data 3. [file elife-69975-fig5-figsupp1-data3.xlsx]

## Sheet: Sheet1
Figure 5 - figure supplement 1C	DN3a	Sel1lfl/fl	Sel1lfl/fl hCD2-iCre			DN3b	Sel1lfl/fl	Sel1lfl/fl hCD2-iCre			DN4	Sel1lfl/fl	Sel1lfl/fl hCD2-iCre		n = 5 mice
		5.65	10.1	P value			51.7	50	P value			50.3	46.7	P value	Biological replicates
		6.74	9.95	0.8735			55	46.5	0.1607			59.2	42	0.1361
		13.7	5.47				52.3	25.6				56.8	40.2
		5.74	4.82				51	34.8				44.6	45
		4.92	4.74				27.1	21.7				40.7	46.7
Figure 5 - figure supplement 1F	Total thymocytes	OTII, Sel1lfl/fl	OTII, Sel1lfl/fl hCD2-iCre		n = 6~7 mice
		68.4	8.955		Biological replicates
		42.3	14.67
		49.3519	8.955		P value	0.0001
		33.5534	11.4
		98.8365	6.4737
		75.2778	5.36786
		63.5467
Figure 5 - figure supplement 1G		OTII, Sel1lfl/fl							OTII, Sel1lfl/fl hCD2-iCre							n = 6~7 mice		Adjusted P Value
	DN	11.5596	8.6715	7.99968	6.14544	14.5288	11.955	10.824	4.46854	8.52327	4.79092	5.4378	5.09582	4.03267		Biological replicates		0.0097
	DP	35.0208	24.1956	23.9478	15.9018	50.1904	35.0888	32.0128	3.78796	4.66506	3.44767	5.016	1.22355	1.24821				0.0014
	SP4	17.1684	6.768	17.2301	11.3534	34.036	28.1021	20.336	0.066267	0.118827	0.0653715	0.10488	0.22594	0.123126				0.0049
Figure 5 - figure supplement 1H		OTII, Sel1lfl/fl							OTII, Sel1lfl/fl hCD2-iCre							n = 6~7 mice		Adjusted P Value
	DN3	4.87008	3.79854	2.71784	2.05542	6.27888	5.02266	4.31648	2.31039	4.63572	2.73128	3.0552	2.58614	2.20272		Biological replicates		0.1325
	DN4	3.87144	3.2148	4.51777	3.61088	6.96976	5.95422	5.74656	1.40593	2.55258	1.19101	1.5276	1.93266	1.51366				0.0001
