# Supplementary material for: Notch-induced endoplasmic reticulum-associated degradation governs mouse thymocyte β−selection
Source: eLife. 2021 Jul 9;10:e69975. doi: 10.7554/eLife.69975 (PMC8315795; doi:10.7554/eLife.69975)
Supplement: Figure 5—figure supplement 2—source data 3. [file elife-69975-fig5-figsupp2-data3.xlsx]

## Sheet: Sheet1
Figure 5 - figure supplement 2C	Calreticulin	Sel1lfl/fl	Sel1lfl/fl hCD2-iCre			Hspa5	Sel1lfl/fl	Sel1lfl/fl hCD2-iCre			Hyou1	Sel1lfl/fl	Sel1lfl/fl hCD2-iCre			Grp94	Sel1lfl/fl	Sel1lfl/fl hCD2-iCre			Canx	Sel1lfl/fl	Sel1lfl/fl hCD2-iCre			n = 3 mice
		0.0792307	0.148717	P value			0.0838976	0.22079	P value			0.0181229	0.0614325	P value			0.127286	0.20394	P value			0.0396944	0.121885	P value		Biological replicates
		0.0710563	0.177565	0.0015			0.0473827	0.263277	0.0019			0.0156951	0.0638025	0.0002			0.103124	0.227142	0.0028			0.0431363	0.130632	0.0002
		0.0809381	0.188167				0.0679014	0.308231				0.016404	0.072963				0.124029	0.255988				0.056114	0.134425
	Erlec1	Sel1lfl/fl	Sel1lfl/fl hCD2-iCre			Os9	Sel1lfl/fl	Sel1lfl/fl hCD2-iCre			Edem1	Sel1lfl/fl	Sel1lfl/fl hCD2-iCre			Hrd1	Sel1lfl/fl	Sel1lfl/fl hCD2-iCre
		0.00147785	0.00271312	P value			0.0188638	0.0250905	P value			0.0273368	0.0461501	P value			0.017676	0.0482646	P value
		0.00160272	0.00240068	0.0429			0.0207256	0.0229479	0.011			0.0300617	0.0516846	0.0137			0.0170992	0.0451681	<0.0001
		0.00231393	0.00281929				0.0192915	0.0264389				0.0377139	0.0593519				0.0181983	0.0448393
Figure 5 - figure supplement 2D	Calreticulin	Sel1lfl/fl	Sel1lfl/fl hCD2-iCre			Hspa5	Sel1lfl/fl	Sel1lfl/fl hCD2-iCre			Hyou1	Sel1lfl/fl	Sel1lfl/fl hCD2-iCre			Grp94	Sel1lfl/fl	Sel1lfl/fl hCD2-iCre			Canx	Sel1lfl/fl	Sel1lfl/fl hCD2-iCre			n = 3 mice
		0.0792967	0.144027	P value			0.0739913	0.107309	P value			0.012105	0.0463327	P value			0.0451812	0.145996	P value			0.0666513	0.108399	P value		Biological replicates
		0.0785508	0.121926	0.0029			0.044812	0.166006	0.0136			0.0141901	0.0331916	0.0029			0.0704063	0.150398	0.0085			0.0643162	0.101596	0.0673
		0.0584623	0.141913				0.0313304	0.158597				0.0109532	0.0365823				0.0314215	0.107602				0.0314147	0.0718723
