# Supplementary material for: Notch-induced endoplasmic reticulum-associated degradation governs mouse thymocyte β−selection
Source: eLife. 2021 Jul 9;10:e69975. doi: 10.7554/eLife.69975 (PMC8315795; doi:10.7554/eLife.69975)
Supplement: Figure 5—source data 3. [file elife-69975-fig5-data3.xlsx]

## Sheet: Sheet1
Figure 5G	ER tracker	Sel1lfl/fl	Sel1lfl/fl hCD2-iCre		n = 3~4 mice
		31039	53955		Biological replicates
		38723	47789
		30523	53693		P value	0.007
		19576
Figure 5K	TMI	Sel1lfl/fl	Sel1lfl/fl hCD2-iCre		n = 3 mice
		13769	17255		Biological replicates
		14076	16878
		14180	18124		P value	0.0009
Figure 5N	Aggresome	Sel1lfl/fl	Sel1lfl/fl hCD2-iCre		n = 3 mice
		0.0314868	0.0467559		Biological replicates
		0.0573135	0.0535203
		0.043506	0.0690548		P value	<0.0001
		0.00139861	0.0522824
		0.00140079	0.0486437
		0.00142044	0.062922
		0.00142263	0.0615343
		0.00143212	0.0759045
		0.00143261	0.0943767
		0.00139961	0.0573144
		0.00141424	0.065556
		0.00142132	0.0609463
		0.00142434	0.0728236
		0.00144334	0.0309404
		0.00143103	0.0466777
		0.00140676	0.0180106
		0.00141204	0.0619637
		0.0256389	0.0872899
		0.0415306	0.0848181
		0.040007	0.0981174
		0.0442971	0.0935816
		0.0210932	0.111814
		0.0206524	0.0822852
		0.0234277	0.0307722
		0.027999	0.0625932
		0.0344311	0.0663481
		0.0277917
		0.0617575
		0.0555746
		0.044676
		0.0320006
		0.0379124
		0.0424921
		0.0242386
		0.0339747
		0.0284681
		0.029188
		0.0257623
		0.0491584
		0.0286283
		0.0299233
		0.028539
		0.029749
		0.0306728
		0.039344
		0.043984
		0.0363041
		0.059229
		0.0416576
		0.018548
		0.0352663
		0.0397255
		0.034302
		0.0357831
		0.0378549
		0.049305
		0.0478127
		0.052001
		0.0376482
		0.0651496
		0.027099
