# Supplementary material for: Notch-induced endoplasmic reticulum-associated degradation governs mouse thymocyte β−selection
Source: eLife. 2021 Jul 9;10:e69975. doi: 10.7554/eLife.69975 (PMC8315795; doi:10.7554/eLife.69975)
Supplement: Figure 6—figure supplement 1—source data 1. [file elife-69975-fig6-figsupp1-data1.xlsx]

## Sheet: Sheet1
Figure 6 - figure supplement 1A	Total thymocytes	Ctrl	Sel1l KO	Xbp1 KO	DKO			P value	n = 3~6 mice
		210	21.76	150.4	3.472		Ctrl vs. S KO	<0.0001	Biological replicates
		260	93.6	237.6	6.08		Ctrl vs. X KO	0.4271
		266	51.28	200	2.608		Ctrl vs. dKO	<0.0001
		267.125	75.257	314.4			S KO vs. X KO	0.0022
		272.775	93.2596				S KO vs. dKO	0.0139
		229.382	130.701				X KO vs. dKO	0.0029
	DP	Ctrl	Sel1l KO	Xbp1 KO	DKO			P value	n = 3~6 mice
		162.75	15.5366	128.592	0.489552		Ctrl vs. S KO	<0.0001	Biological replicates
		209.82	71.2296	206.95	1.75712		Ctrl vs. X KO	0.8731
		218.12	37.178	173.6	0.234981		Ctrl vs. dKO	<0.0001
		214.062	62.656	274.471			S KO vs. X KO	0.0013
		217.691	70.3478				S KO vs. dKO	0.0116
		179.746	97.3202				X KO vs. dKO	0.003
Figure 6 - figure supplement 1B	Chop_DN3	Ctrl	Sel1l KO	Xbp1 KO	DKO			P value	n = 3
		0.00429891	0.00808075	0.00577496	0.0259425		Ctrl vs. S KO	0.0147	Technical replicates
		0.00369528	0.00994368	0.00598425	0.0221014		Ctrl vs. X KO	0.3978
		0.00393761	0.00710212	0.006617	0.0235503		Ctrl vs. dKO	<0.0001
							S KO vs. X KO	0.3399
							S KO vs. dKO	<0.0001
							X KO vs. dKO	<0.0001
								P value
Figure 6 - figure supplement 1C	DN4 G0	Ctrl	Sel1l KO	Perk KO	DKO		Ctrl vs. S KO	<0.0001	n = 3~5 mice
		39.4	17.3	39	29.3		Ctrl vs. P KO	0.7535	Biological replicates
		34.2	11.4	30.1	38.2		Ctrl vs. dKO	0.3677
		38.7	7.31	32.1	31.1		S KO vs. P KO	<0.0001
		35.1	4.79		31.2		S KO vs. dKO	<0.0001
					31.2		P KO vs. dKO	0.9543
								P value
	DN4 G1	Ctrl	Sel1l KO	Perk KO	DKO		Ctrl vs. S KO	<0.0001
		48	56.7	49.7	55.6		Ctrl vs. P KO	0.2414
		49.6	63	53.3	50.4		Ctrl vs. dKO	0.0313
		47.1	59.8	50.6	52.1		S KO vs. P KO	0.0003
		47.6	62.5		51.9		S KO vs. dKO	0.0004
					52.6		P KO vs. dKO	0.8135
								P value
	DN4 S/G2/M	Ctrl	Sel1l KO	Perk KO	DKO		Ctrl vs. S KO	<0.0001
		12.4	25.8	11.2	14.9		Ctrl vs. P KO	>0.9999
		16	25.5	16.1	11.2		Ctrl vs. dKO	0.9994
		13.9	32.8	17.1	16.6		S KO vs. P KO	0.0002
		17	32.7		16.7		S KO vs. dKO	<0.0001
					15.9		P KO vs. dKO	0.9993
