# Supplementary material for: Notch-induced endoplasmic reticulum-associated degradation governs mouse thymocyte β−selection
Source: eLife. 2021 Jul 9;10:e69975. doi: 10.7554/eLife.69975 (PMC8315795; doi:10.7554/eLife.69975)
Supplement: Figure 6—source data 1. [file elife-69975-fig6-data1.xlsx]

## Sheet: Sheet1
Figure 6B	Total thymocytes						P value		DP						P value		SP4						P value		SP8						P value
	Ctrl	Sel1l KO	Perk KO	DKO		Ctrl vs. S KO	0.0128		Ctrl	Sel1l KO	Perk KO	DKO		Ctrl vs. S KO	0.0131		Ctrl	Sel1l KO	Perk KO	DKO		Ctrl vs. S KO	0.0007		Ctrl	Sel1l KO	Perk KO	DKO		Ctrl vs. S KO	0.0008		n = 3~5 mice
	378.574	147.698	258.448	189.724		Ctrl vs. P KO	0.9975		308.419	108.601	209.518	151.779		Ctrl vs. P KO	0.9998		27.7219	8.85317	18.0172	15.1217		Ctrl vs. P KO	0.9977		9.75993	2.21047	4.32812	4.31865		Ctrl vs. P KO	0.0716		Biological replicates
	251.709	138.01	286.935	191.761		Ctrl vs. dKO	0.8199		189.947	102.214	231.99	148.492		Ctrl vs. dKO	0.8285		20.8186	7.81376	22.625	18.3716		Ctrl vs. dKO	0.7592		7.02245	2.20698	3.71322	5.23066		Ctrl vs. dKO	0.185
	167.845	87.9456	196.547	243.713		S KO vs. P KO	0.029		131.405	65.5195	152.87	189.827		S KO vs. P KO	0.0246		14.0146	4.27785	17.6353	19.8582		S KO vs. P KO	0.0018		3.93275	1.22649	3.69821	5.62757		S KO vs. P KO	0.165
	222.854	58.894		239.011		S KO vs. dKO	0.0412		174.707	36.5894		186.813		S KO vs. dKO	0.0407		17.1822	2.73184		17.7375		S KO vs. dKO	0.0022		6.03191	0.961851		4.07033		S KO vs. dKO	0.0189
				250		P KO vs. dKO	0.929					195.707		P KO vs. dKO	0.897					16.5883		P KO vs. dKO	0.8893					4.57942		P KO vs. dKO	0.8118
Figure 6D	Total Splenocytes						P value		T cell						P value		CD4						P value		CD8						P value		n = 3~5 mice
	Ctrl	Sel1l KO	Perk KO	DKO		Ctrl vs. S KO	0.000142736		Ctrl	Sel1l KO	Perk KO	DKO		Ctrl vs. S KO	2.46438e-06		Ctrl	Sel1l KO	Perk KO	DKO		Ctrl vs. S KO	8.24869e-06		Ctrl	Sel1l KO	Perk KO	DKO		Ctrl vs. S KO	1.62618e-05		Biological replicates
	77.0873	26.3196	180.45	61.026		Ctrl vs. P KO	0.242732		18.181	2.02909	30.551	18.4606		Ctrl vs. P KO	0.263363		11.9963	1.46344	20.4772	13.5441		Ctrl vs. P KO	0.278224		6.24888	0.768148	9.20664	5.60472		Ctrl vs. P KO	0.526068
	63.1052	12.9984	71.8732	43.361		Ctrl vs. dKO	0.0450104		20.5535	1.77965	17.2976	14.4205		Ctrl vs. dKO	0.821862		12.1894	1.41116	12.1064	12.4306		Ctrl vs. dKO	0.707771		8.13419	0.627286	5.13151	2.87128		Ctrl vs. dKO	0.2376
	45.1841	16.2907	58.7442	37.098		S KO vs. dKO	0.00677288		13.6636	1.73511	17.27	14.6868		S KO vs. dKO	0.00312583		8.77321	1.46622	12.2744	10.3506		S KO vs. dKO	0.00267216		4.95346	0.633682	5.16307	4.81948		S KO vs. dKO	0.00578228
	71.0819	11.9915		37.862					17.6865	1.18871		10.2645					12.2715	1.06573		8.22089					5.5842	0.39227		2.4915
				75.539								28.6491								21.7693								7.42487
Figure 6F	Total Lymphocytes						P value		T cell						P value		CD4						P value		CD8						P value		n = 3~5 mice
	Ctrl	Sel1l KO	Perk KO	DKO		Ctrl vs. S KO	0.000144808		Ctrl	Sel1l KO	Perk KO	DKO		Ctrl vs. S KO	9.46081e-05		Ctrl	Sel1l KO	Perk KO	DKO		Ctrl vs. S KO	6.75027e-05		Ctrl	Sel1l KO	Perk KO	DKO		Ctrl vs. S KO	0.000247496		Biological replicates
	10.048	0.543714	8.34948	5.1255		Ctrl vs. P KO	0.197138		6.10489	0.36649	4.92287	4.26783		Ctrl vs. P KO	0.143085		3.50203	0.266098	2.98216	2.77228		Ctrl vs. P KO	0.152292		2.28656	0.102486	1.79246	1.41051		Ctrl vs. P KO	0.143737
	7.63432	0.383686	3.54607	3.75121		Ctrl vs. dKO	0.00555525		4.99889	0.212082	2.07902	2.99667		Ctrl vs. dKO	0.0349253		2.76957	0.158142	1.31684	2.30443		Ctrl vs. dKO	0.0973164		2.07596	0.0514162	0.718728	0.611864		Ctrl vs. dKO	0.0122122
	7.49839	0.455333	3.51201	3.29499		S KO vs. dKO	0.000606364		4.74137	0.192675	2.30991	2.77116		S KO vs. dKO	0.00044098		2.68339	0.131537	1.53159	1.86237		S KO vs. dKO	0.000193896		1.97682	0.0591466	0.711866	0.893997		S KO vs. dKO	0.00399886
	4.34115	0.499832		2.19174					2.90775	0.28859		1.85567					1.76495	0.226792		1.36718					1.0574	0.0706038		0.465781
				3.76079								3.04479								2.09671								0.826661
Figure 6G	Chop_DN3						P Value		n = 3~5 mice
	Ctrl	Sel1l KO	Perk KO	DKO		Ctrl vs. S KO	0.0101		Biological replicates
	0.00285889	0.00870887	0.00370582	0.00719482		Ctrl vs. P KO	0.7462
	0.00522212	0.0082946	0.00198374	0.00458967		Ctrl vs. DKO	0.8541
	0.00341875	0.00612526	0.00152807	0.00589383		S KO vs. P KO	0.0029
	0.00396959	0.0131342		0.00372818		S KO vs. DKO	0.0282
				0.00299405		P KO vs. DKO	0.3241
Figure 6I	CC3								n = 4 mice
	Ctrl	Sel1l KO	Perk KO	DKO					Biological replicates
	53	79	10	29			P Value
	54	82	12	40		Ctrl vs. S KO	<0.0001
	51	96	16	42		Ctrl vs. P KO	<0.0001
	42	99	9	31		Ctrl vs. DKO	>0.9999
	42	99	15	39		S KO vs. P KO	<0.0001
	51	109	19	37		S KO vs. DKO	<0.0001
	27	153	18	50		P KO vs. DKO	0.0001
	54	132	10	39
	61	128	16	58
	43	136	16	40
	47	117	8	45
	46	156		44
		140		47
		116		56
		128
		156
		138
		147
